# Supplementary material for: Histidine modulates amyloid-like assembly of peptide nanomaterials and confers enzyme-like activity
Source: PubMed Central journal article supplement (PMC10509148; doi:10.1038/s41467-023-41591-1), 2023-09-19
Supplement: 41467_2023_41591_MOESM1_ESM.pdf [file 41467_2023_41591_MOESM1_ESM.pdf]

# **Histidine modulates amyloid-like assembly of peptide nanomaterials and confers enzyme-like activity**

Ye Yuan<sup>1,2,3</sup>, Lei Chen<sup>2</sup>, Lingfei Kong<sup>4</sup>, Lingling Qiu<sup>5</sup>, Zhendong Fu<sup>1</sup>, Minmin Su<sup>2</sup>, Yuan Liu<sup>3</sup>,  
Miaomiao Cheng<sup>3</sup>, Saiyu Ma<sup>3</sup>, Xiaonan Wang<sup>2</sup>, Changhui Zhao<sup>1</sup>, Jing Jiang<sup>2</sup>, Xinzheng Zhang<sup>4</sup>,  
Liping Wang<sup>1\*</sup>, Lizeng Gao<sup>2,3\*</sup>

<sup>1</sup>Key Laboratory for Molecular Enzymology and Engineering, School of Life Sciences, Jilin University, Changchun 130012, China

<sup>2</sup>CAS Engineering Laboratory for Nanozyme, Key Laboratory of Biomacromolecules, Institute of Biophysics, Chinese Academy of Sciences, Beijing 100101, China

<sup>3</sup>Nanozyme Medical Center, School of Basic Medical Sciences, Zhengzhou University, Zhengzhou 450001, China

<sup>4</sup>National Laboratory of Biomacromolecules, CAS Center for Excellence in Biomacromolecules, Institute of Biophysics, Chinese Academy of Sciences, Beijing 100101, China

<sup>5</sup>Key Laboratory of Animal Genetics and Breeding and Molecular Design of Jiangsu Province, Yangzhou University, Yangzhou, China

Supplementary Figs. 1-33

Supplementary Tables 1-3

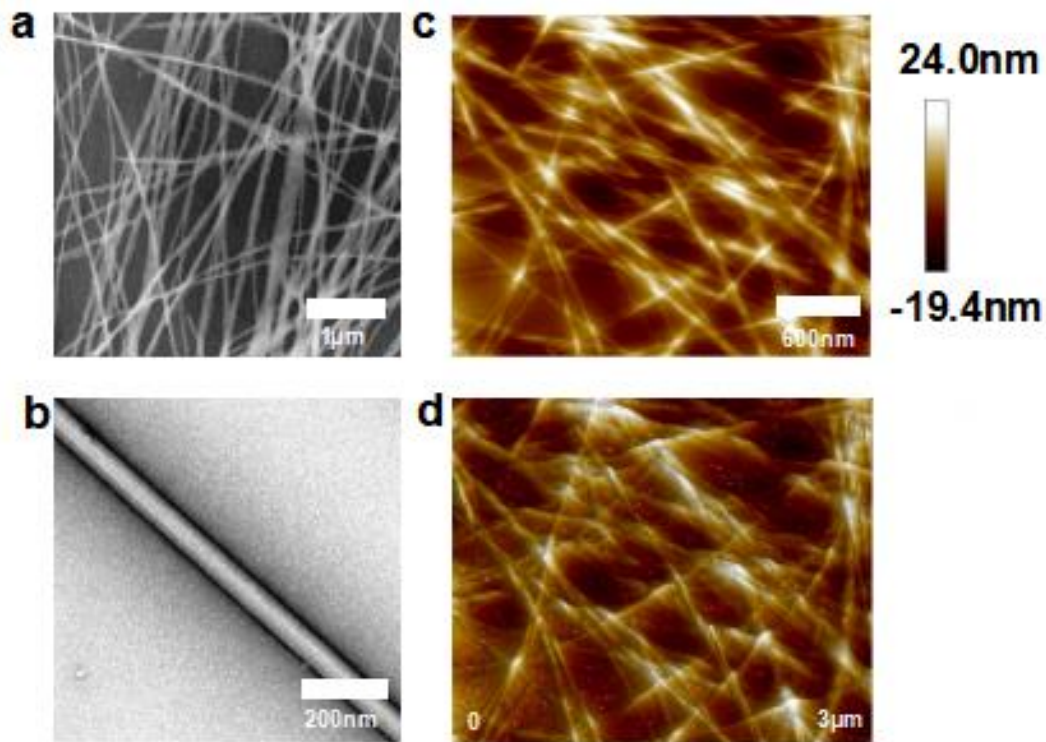

**Supplementary Fig. 1 Basic characterizations for Fmoc-F-F (His).** **a** HAADF for staggered net-like structure Fmoc-F-F (His). **b** Negative staining TEM for the characterization of single filament. **c** AFM for Fmoc-F-F (His) filaments. **d** Phase diagram of Fmoc-F-F (His) filaments characterized by AFM. Three times each experiment was repeated independently with similar results. Representative images are shown.

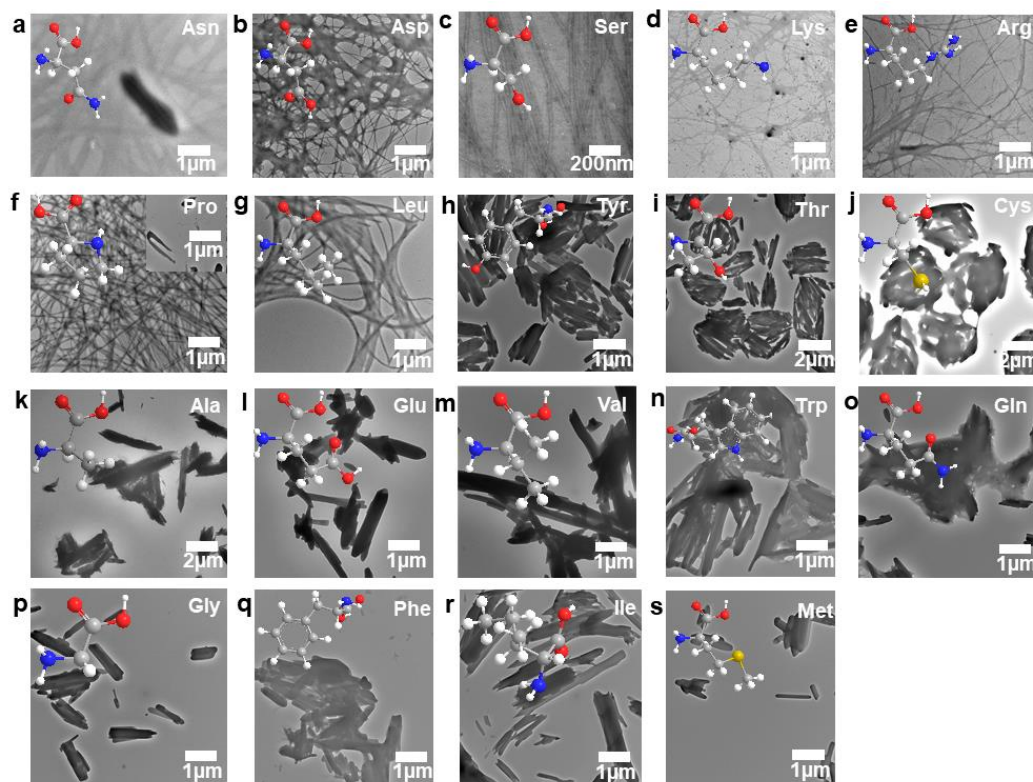

**Supplementary Fig. 2** TEM characterization for Fmoc-F-F co-assembled with different amino acids in water. **a** Fmoc-F-F (Asn). **b** Fmoc-F-F (Asp). **c** Fmoc-F-F (Ser). **d** Fmoc-F-F (Lys). **e** Fmoc-F-F (Arg). **f** Fmoc-F-F (Pro). **g** Fmoc-F-F (Leu). **h** Fmoc-F-F (Tyr). **i** Fmoc-F-F (Thr). **j** Fmoc-F-F (Cys). **k** Fmoc-F-F (Ala). **l** Fmoc-F-F (Glu). **m** Fmoc-F-F (Val). **n** Fmoc-F-F (Trp). **o** Fmoc-F-F (Gln). **p** Fmoc-F-F (Gly). **q** Fmoc-F-F (Phe). **r** Fmoc-F-F (Ile). **s** Fmoc-F-F (Met). Three times each experiment was repeated independently with similar results. Representative images are shown.

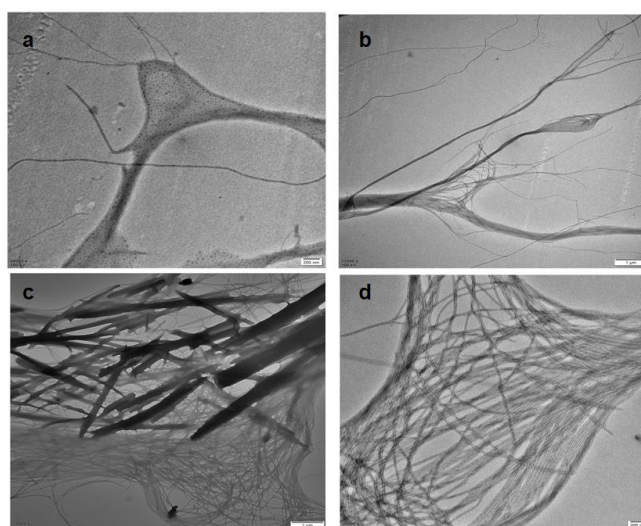

**Supplementary Fig. 3** Fmoc-F-F (His) co-assembly at different sonication time. **a** and **b** 10 min. **c** 20 min. **d** 45 min. Three times each experiment was repeated independently with similar results. Representative images are shown.

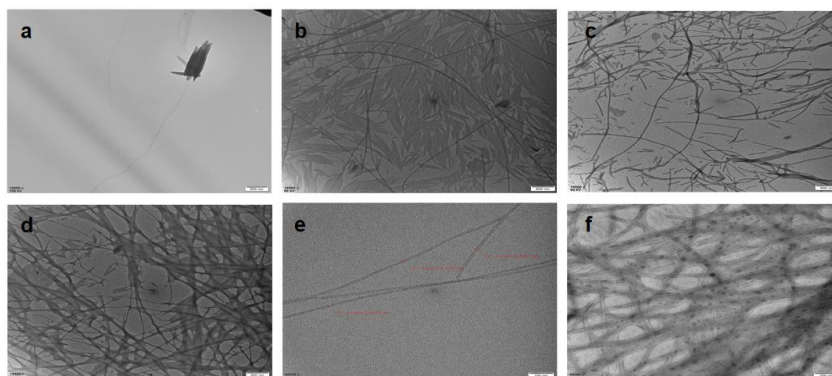

**Supplementary Fig. 4 TEM characterization for Fmoc-F-F (His) co-assembly with different His concentrations** (Fmoc-F-F was fixed at  $2\text{ mg mL}^{-1}$ ). **a**  $2\text{ mg mL}^{-1}$ . **b**  $10\text{ mg mL}^{-1}$ . **c**  $12\text{ mg mL}^{-1}$ . **d**  $14\text{ mg mL}^{-1}$ . **e**  $18\text{ mg mL}^{-1}$ . **f**  $30\text{ mg mL}^{-1}$ . Three times each experiment was repeated independently with similar results. Representative images are shown.

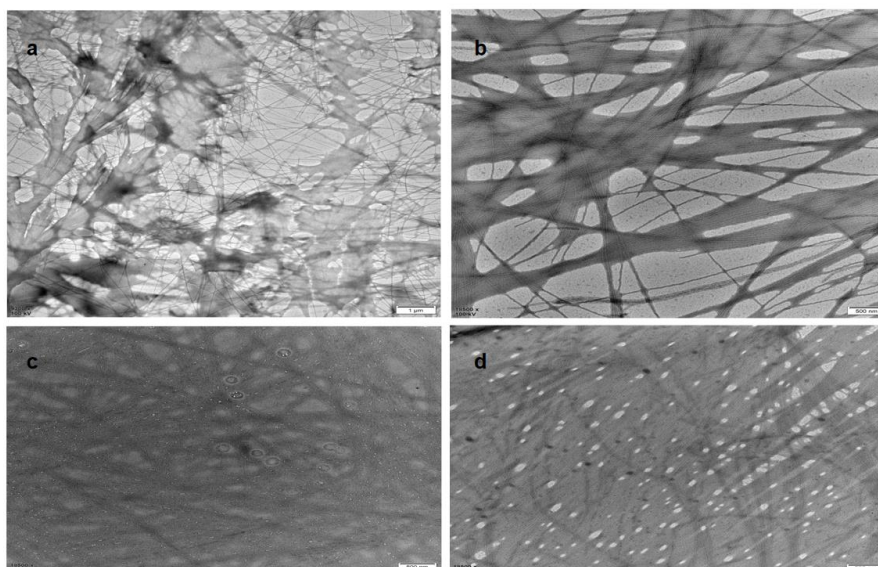

**Supplementary Fig. 5 TEM characterization for Fmoc-F-F (His) co-assembly with different Fmoc-F-F concentrations** (His was fixed at  $20\text{ mg mL}^{-1}$ ). **a**  $0.5\text{ mg mL}^{-1}$ . **b**  $1\text{ mg mL}^{-1}$ . **c**  $3\text{ mg mL}^{-1}$ . **d**  $10\text{ mg mL}^{-1}$ . Three times each experiment was repeated independently with similar results. Representative images are shown.

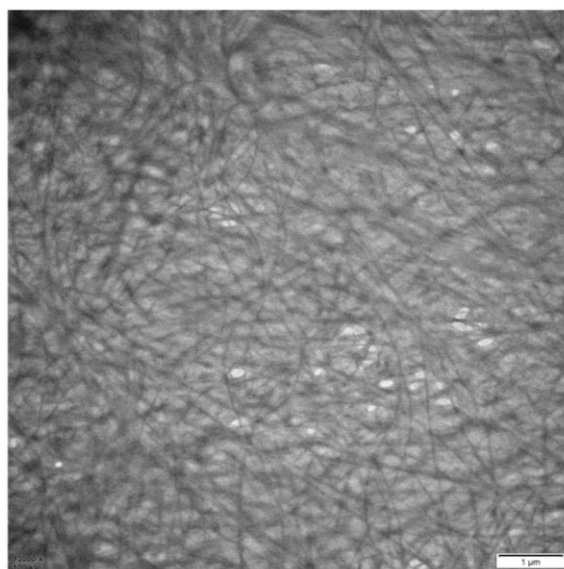

**Supplementary Fig. 6 Fmoc-F-F (His) filaments formed in low-resistance water.** Three times each experiment was repeated independently with similar results. Representative image is shown.

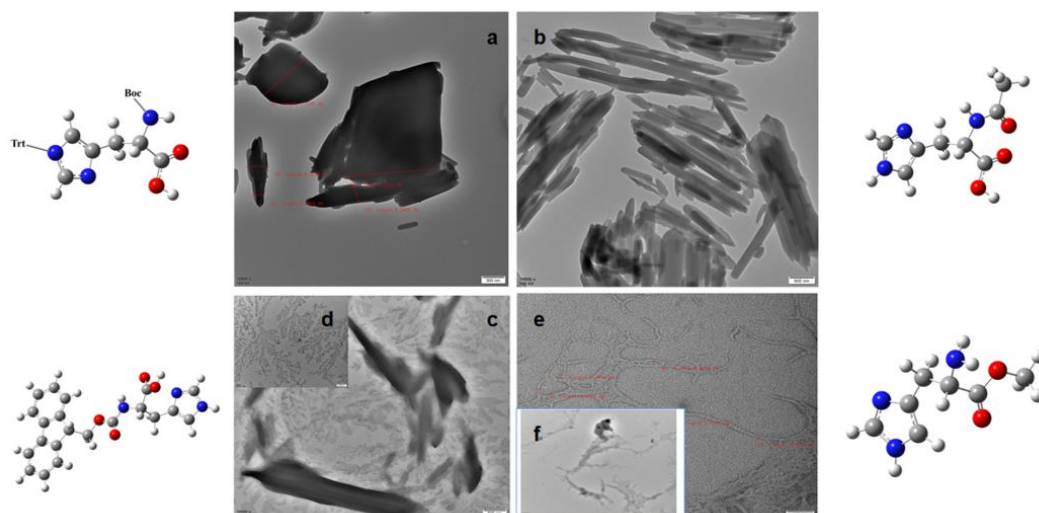

**Supplementary Fig. 7 TEM characterization for Fmoc-F-F (His) co-assembly with side-chain modified His.** **a** N-Boc-N'-trityl-L-histidine (Boc-His(Trt)-OH). **b** N-Acetyl-L-histidine (N-Acetyl-L-His). **c** and **d** Fmoc-His. **e** and **f** L-Histidine Methyl Ester Dihydrochloride (His-OMe). Three times each experiment was repeated independently with similar results. Representative images are shown.

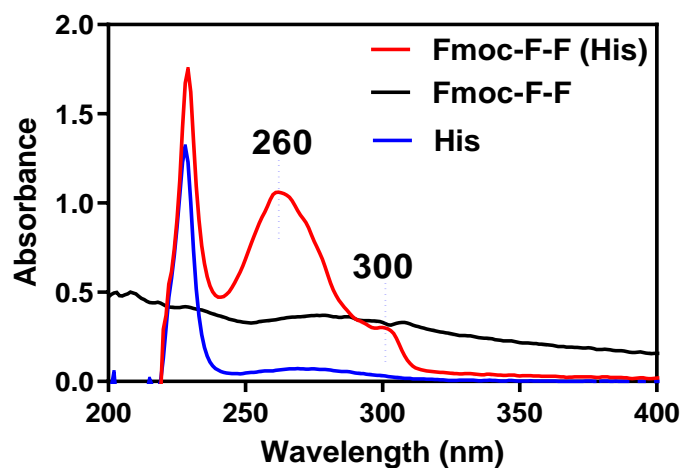

**Supplementary Fig. 8 UV-VIS characterization of functional group of Fmoc-F-F(His).** UV-VIS assay confirmed the presence of benzene ring and Fmoc in Fmoc-F-F (His) nanofilaments, indicating the interaction of His and Fmoc-F-F.

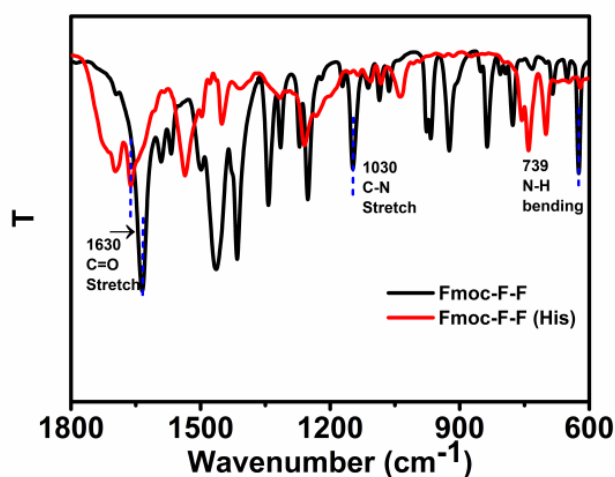

**Supplementary Fig. 9 FTIR characterization of non-covalent interactions between His and Fmoc-F-F.** FTIR spectra (600-1800  $\text{cm}^{-1}$ ) of Fmoc-F-F (His) and Fmoc-F-F were provided. C-N stretching (1030  $\text{cm}^{-1}$ ), N-H bending (739  $\text{cm}^{-1}$ , 3300  $\text{cm}^{-1}$ ) and C=O (1630  $\text{cm}^{-1}$ ) of Fmoc-F-F (His) were compared to Fmoc-F-F.

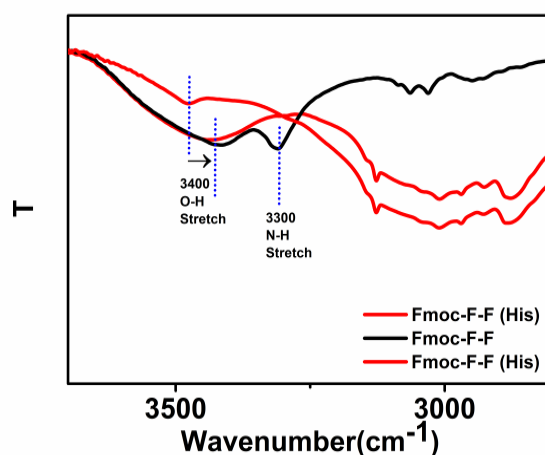

**Supplementary Fig. 10 FTIR characterization of non-covalent interactions between His and Fmoc-F-F.** FTIR spectra (2 800-3 700  $\text{cm}^{-1}$ ) were provided. -OH stretch (3 400  $\text{cm}^{-1}$ ) and N-H stretch (3 300  $\text{cm}^{-1}$ ) of Fmoc-F-F (His) were compared to Fmoc-F-F.

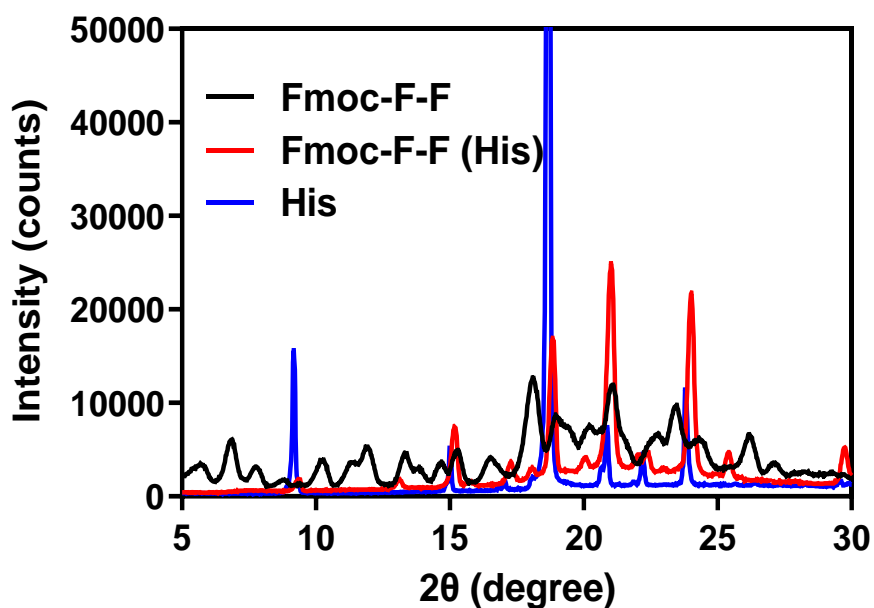

**Supplementary Fig. 11 X-ray diffraction (XRD) characterization of Fmoc-F-F (His).** The XRD was used to confirm the interaction between Fmoc-F-F and His in Fmoc-F-F (His) nanofilaments. Compared to Fmoc-F-F or His, strong diffraction peaks at  $21^\circ$  and  $24^\circ$  were formed in Fmoc-F-F (His).

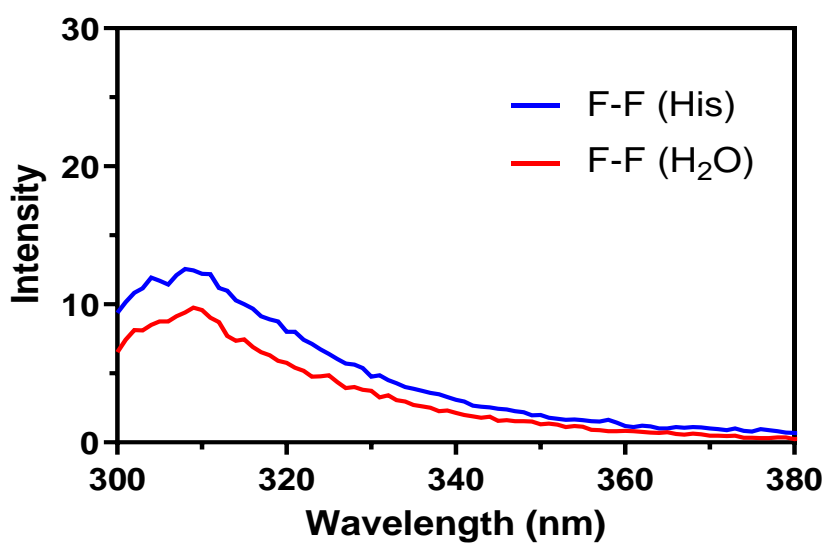

**Supplementary Fig. 12** Fluorescence emission spectrum of F-F (His) and F-F. In the absence of Fmoc, both F-F and F-F (His) showed weak fluorescence intensity between 300-320 nm

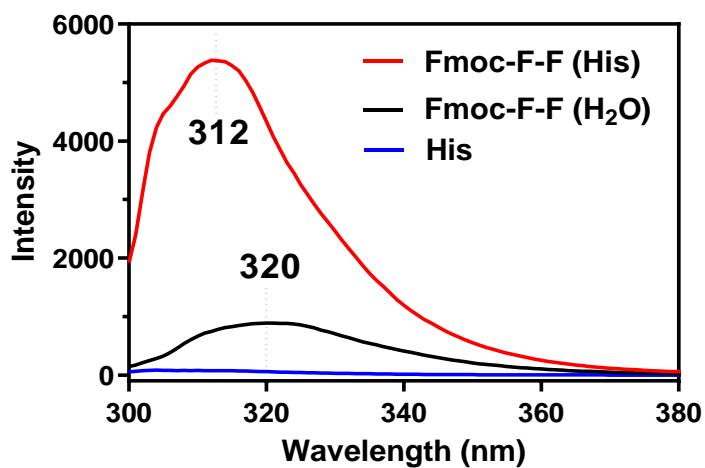

**Supplementary Fig. 13** Fluorescence emission spectrum of Fmoc-F-F (His). The enhanced intensity of Fmoc-F-F (His) between 300-320 nm confirmed the strong interaction between Fmoc-F-F and His, and the characteristic peak was shifted from 320 nm to 312 nm, indicating that the  $\pi$ - $\pi$  action of Fmoc-F-F was weakened in the presence of His.



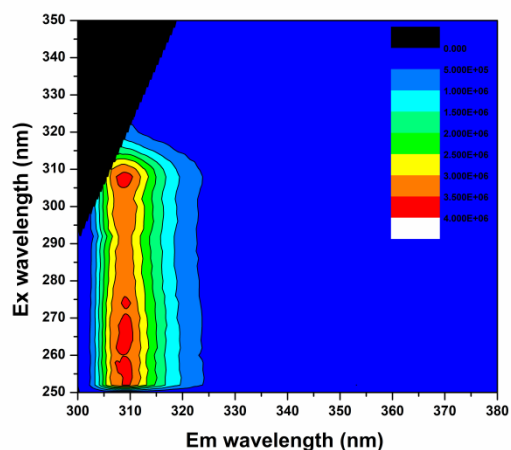

**Supplementary Fig. 14 Three-dimensional fluorescence spectrum of Fmoc-F-F (His) nanofilaments.** Three-dimensional fluorescence spectrum of Fmoc-F-F (His) nanofilaments were collected when setting the Em wavelength and Ex wavelength from 300-380 nm, 250-350 nm, respectively. The strong intensity were demonstrated at ~310 nm, which is consistent with the results of Supplementary Fig. 13.

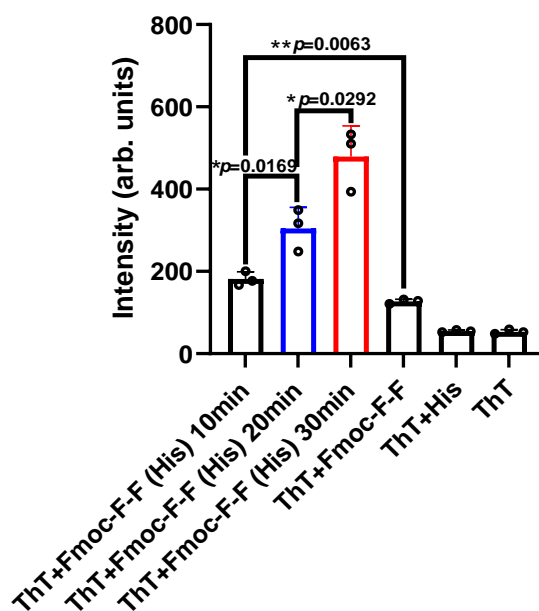

**Supplementary Fig. 15 ThT-binding assay for the formation of amyloid-like filaments by Fmoc-F-F (His).** n=3 independent samples, bars represent means  $\pm$  SD. The significant difference was evaluated by two-tailed unpaired t-test. \*\* $p < 0.01$ , \* $p < 0.05$ .

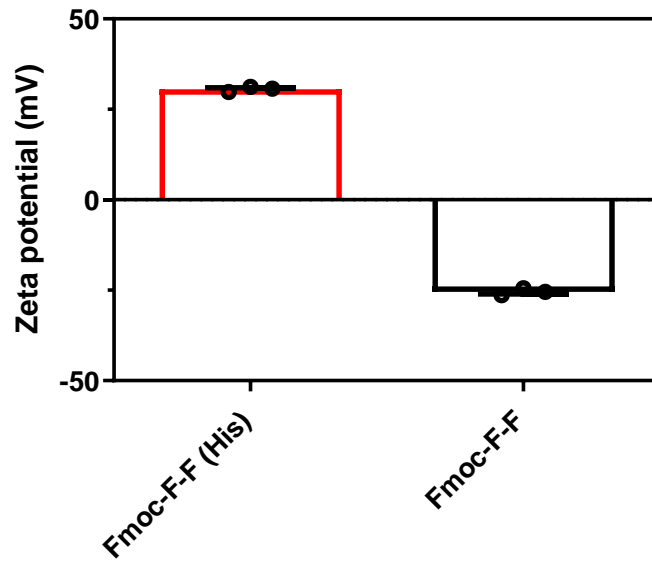

**Supplementary Fig. 16 Zeta potential assay for the electrostatic interaction between His and Fmoc-F-F.** The Fmoc-F-F (His) showed the positive potentials, while Fmoc-F-F was negative charged, indicating that His led to the remarkable charge inversion when adding His into Fmoc-F-F system.  $n=3$  independent samples, bars represent means  $\pm$  SD. The significant difference was evaluated by two-tailed unpaired t-test.  $**p < 0.01$ ,  $*p < 0.05$ .

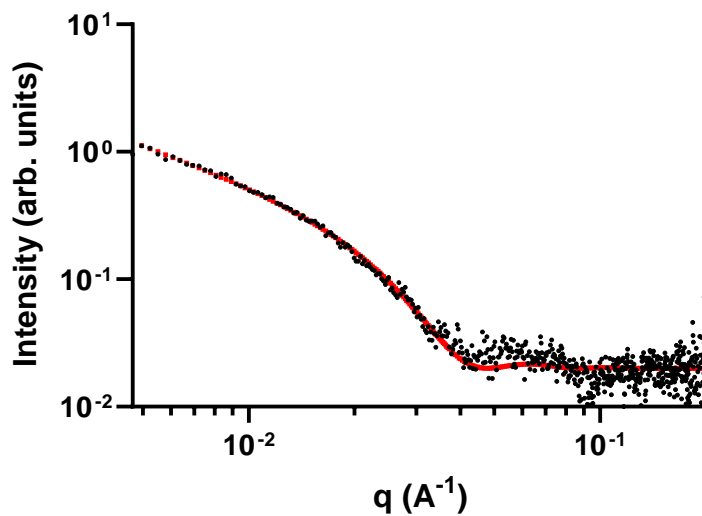

**Supplementary Fig. 17 The SAXS data of Fmoc-F-F (His) nanofilaments.** The fitting was conducted using SasView software and the radius ( $R$ ) of nanofilaments was estimated at 8.18 nm.

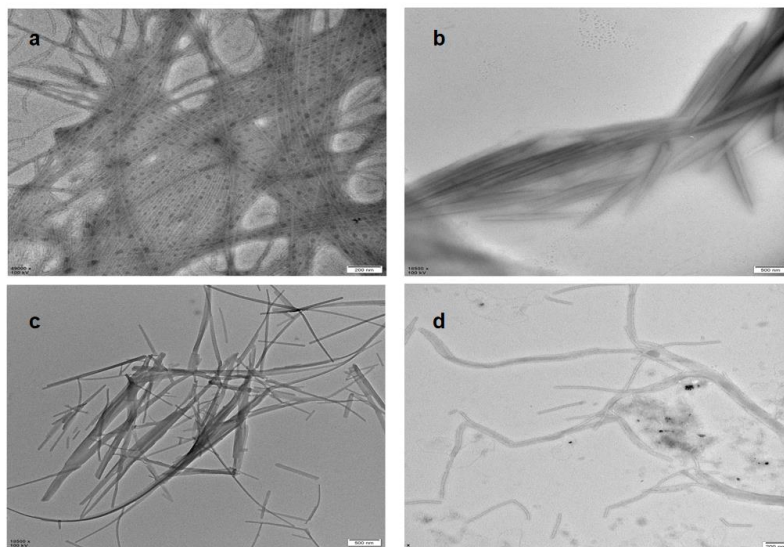

**Supplementary Fig. 18 Dynamic balance of Fmoc-F-F (His).** **a** His changed the morphology of pre-assembled Fmoc-F-F nanorods. When His was added to pre-assembled Fmoc-F-F nanorods, filaments could also appear, but the degree of fibrillogenesis was obviously weaker than simultaneous co-assembly of Fmoc-F-F and His, indicating that His could depolymerize self-assembled Fmoc-F-F nanorods into nanofilaments. **b** The morphology of co-assembled Fmoc-F-F (His) at low concentration of Fmoc-F-F ( $0.2 \text{ mg mL}^{-1}$ ) and His ( $2 \text{ mg mL}^{-1}$ ). Low concentrations of Fmoc-F-F and His formed shorter filaments, indicating that the growth of filaments is dependent on the concentration of co-assembly moieties. **c** The morphology of Fmoc-F-F (His) nanofilaments after removing His by dialysis. The 3 kD molecular weight dialysis membrane was used to remove free His. After dialysis, filaments had a tendency to aggregate into nanorods, indicating that even free His plays an important role in maintaining the degree of fibrillogenesis of Fmoc-F-F (His). **d** The morphology of Fmoc-F-F (His) nanofilaments after removing His using centrifugation. After centrifuging Fmoc-F-F (His) at  $3600 \text{ xg}$  for 5 min, filaments became shorter, further demonstrating that His play a critical role in the assembly of nanofilaments. Three times each experiment was repeated independently with similar results. Representative images are shown.

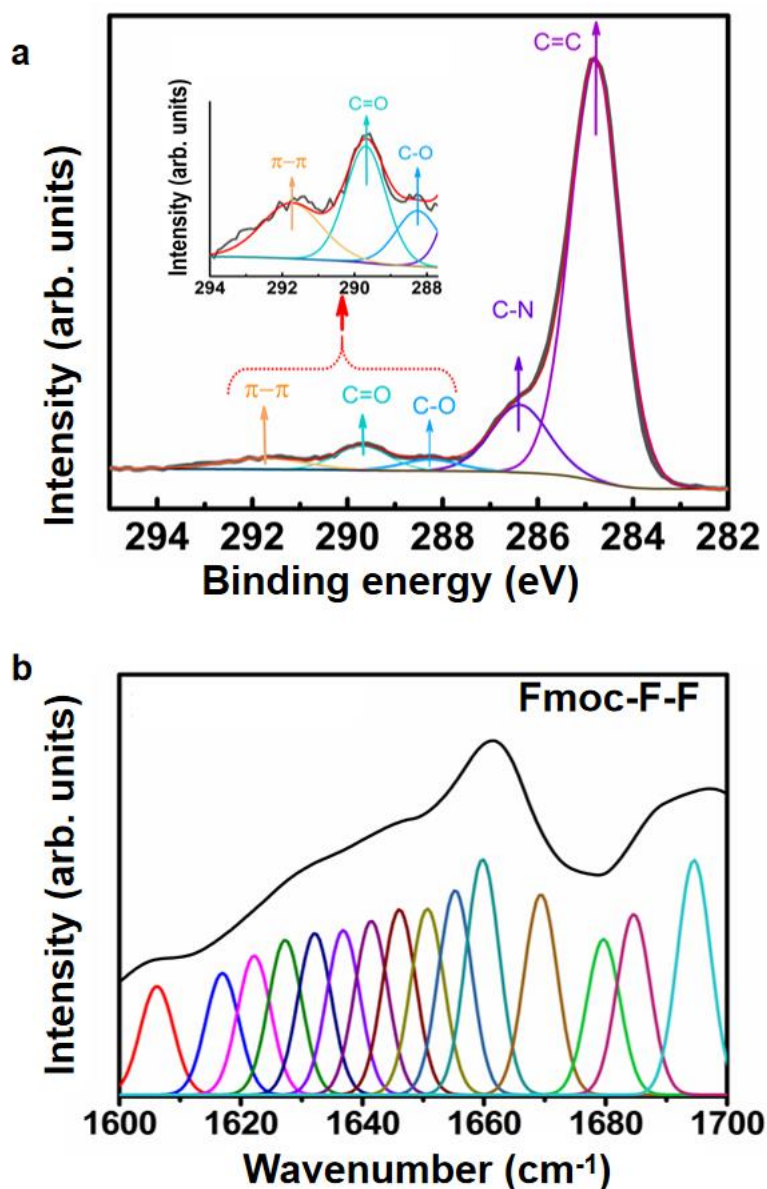

**Supplementary Fig. 19** The characterization of  $\pi$ - $\pi$  stacking and secondary structure of Fmoc-F-F. **a** C 1s peaks of Fmoc-F-F nanofilaments analyzed by X-ray photoelectron spectroscopy (XPS). **b** Percentage of secondary structure for the amide I region ( $1600\text{ cm}^{-1}$  to  $1700\text{ cm}^{-1}$ ) of Fmoc-F-F nanofilaments characterized by FTIR.

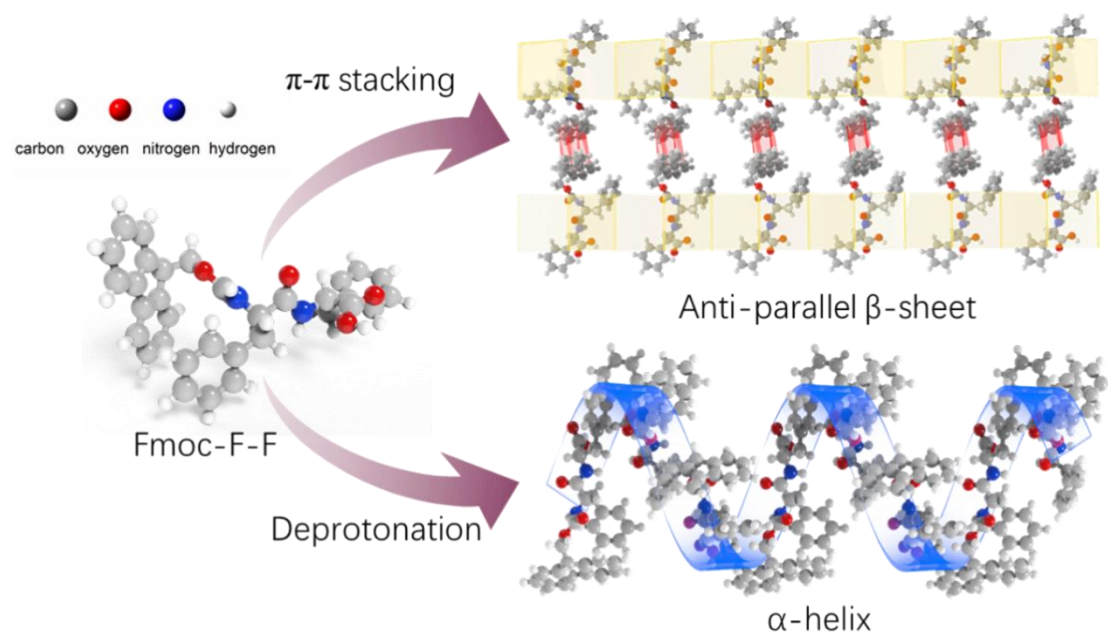

**Supplementary Fig. 20 Proposed mechanism for the self-assembly of Fmoc-F-F driven by anti-parallel  $\beta$ -sheet and  $\alpha$ -helix secondary structures.** Two main secondary structures were formed in the assembly of Fmoc-F-F owing to the  $\pi$ - $\pi$  stacking and deprotonation, respectively.

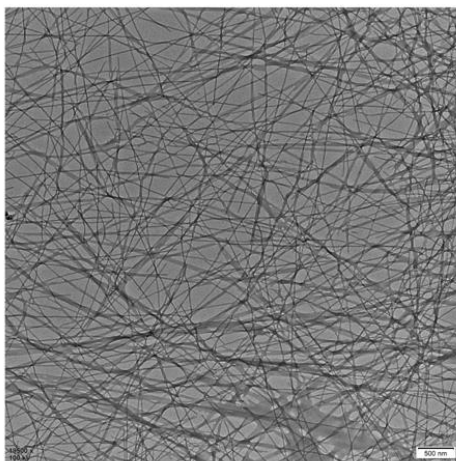

**Supplementary Fig. 21 TEM characterization for Fmoc-F-F (His) nanofilaments.** The as-prepared Fmoc-F-F (His) nanofilaments were stored at room temperature for 60 days. 3 times each experiment was repeated independently with similar results. Representative image is shown.

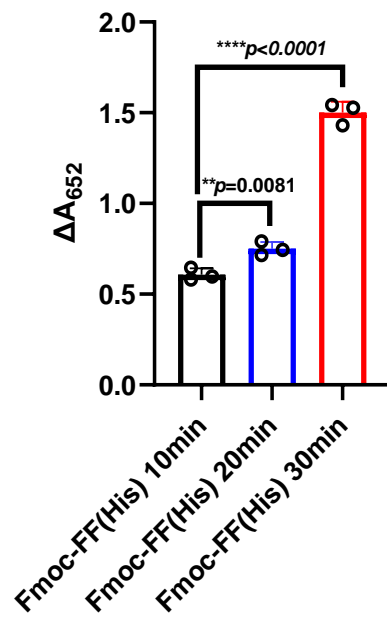

**Supplementary Fig. 22** POD-activity of Fmoc-F-F (His) assembled under different assembly time. n=3 independent samples, bars represent means  $\pm$  SD, The significant difference was evaluated by two-tailed unpaired t-test. \*\*\*\* $p < 0.0001$ , \*\* $p < 0.01$ .

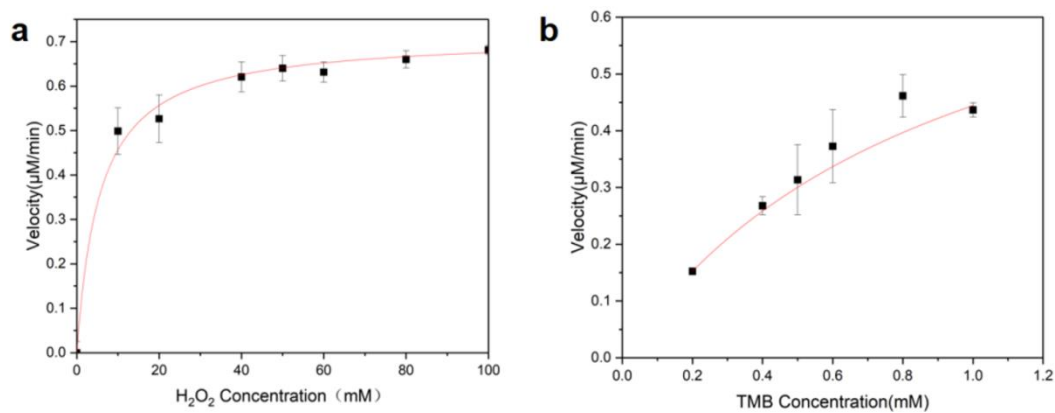

**Supplementary Fig. 23** Enzymatic kinetics assays for Fmoc-F-F (His) nanofilaments. **a** Michaelis-Menten curves regarding to variable H<sub>2</sub>O<sub>2</sub> concentrations. The concentration of TMB was fixed at 1.0 mM; **b** Michaelis-Menten curves regarding to variable TMB concentrations. The concentration of H<sub>2</sub>O<sub>2</sub> was fixed at 10 mM. n=3 independent samples, bars represent means  $\pm$  SD.

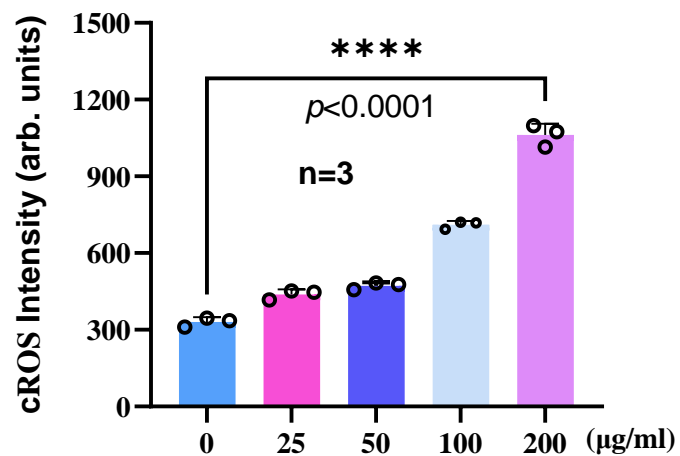

**Supplementary Fig. 24 Cytosolic ROS (cROS) level in PC12 cells treated with Fmoc-F-F (His) nanofilaments.** The significant difference was evaluated by two-tailed unpaired t-test. \*\*\*\* $p < 0.0001$ .

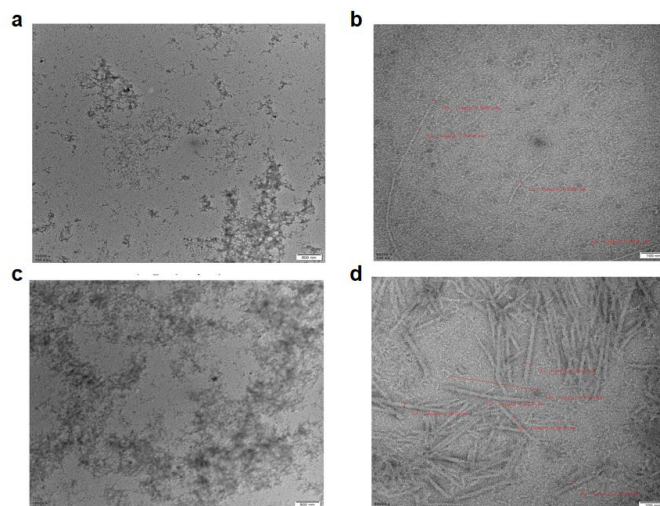

**Supplementary Fig. 25 TEM characterization for the morphology of A $\beta$ 1-40 and A $\beta$ 1-42 assemblies.** **a** A $\beta$ 1-40 Oligomer. **b** A $\beta$ 1-40 incubated at 37°C for 14days. **c** A $\beta$ 1-42 Oligomer. **d** A $\beta$ 1-42 incubated at 37°C for 14days. Three times each experiment was repeated independently with similar results. Representative images are shown.

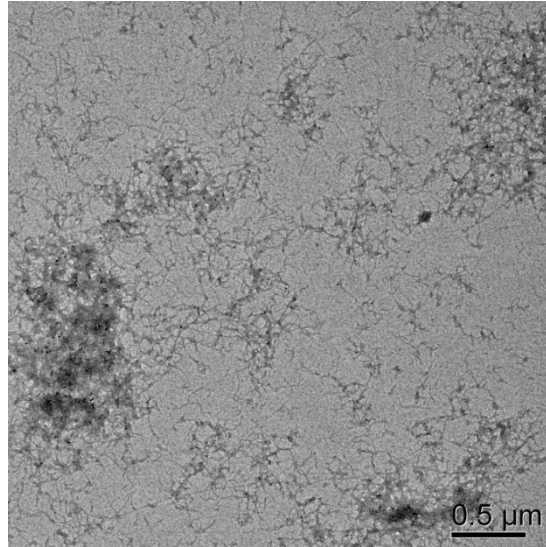

**Supplementary Fig. 26** TEM characterization for A $\beta$ 1-40 aggregates incubated at 37°C for half a year. Three times each experiment was repeated independently with similar results. Representative image is shown.

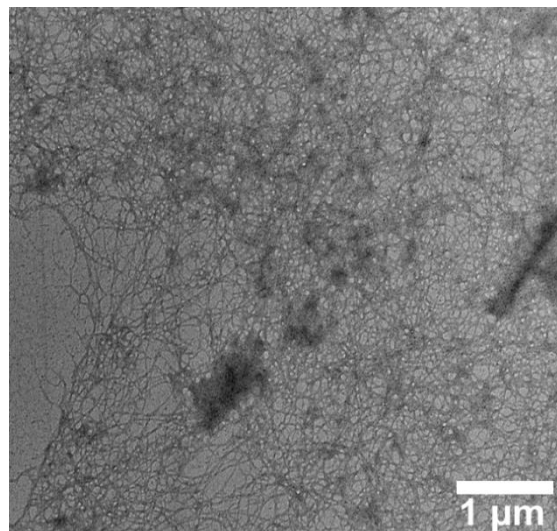

**Supplementary Fig. 27** TEM characterization for A $\beta$ 1-42 aggregates incubated at 37°C for half a year. Three times each experiment was repeated independently with similar results. Representative image is shown.



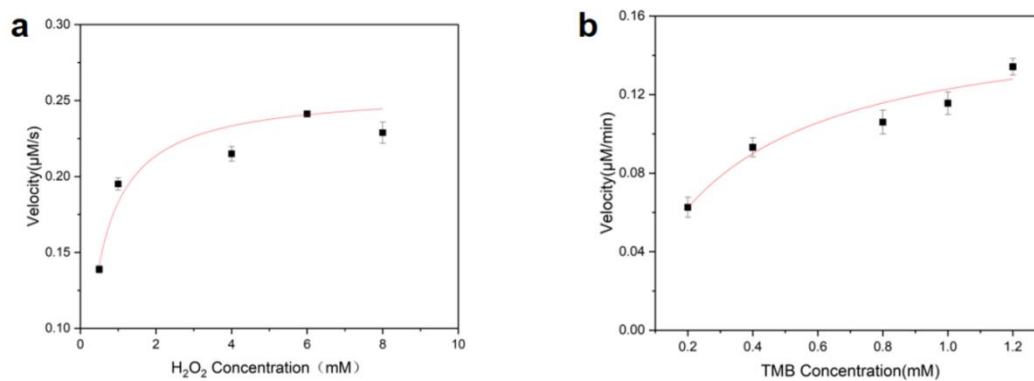

**Supplementary Fig. 28 Enzymatic kinetics assays of A $\beta$  filament. a** Michaelis-Menten curves regarding to variable H<sub>2</sub>O<sub>2</sub> concentrations. The concentration of TMB was fixed at 1.0 mM; **b** Michaelis-Menten curves regarding to variable TMB concentrations. The concentration of H<sub>2</sub>O<sub>2</sub> was fixed at 10 mM. n=3 independent samples, bars represent means  $\pm$  SD.

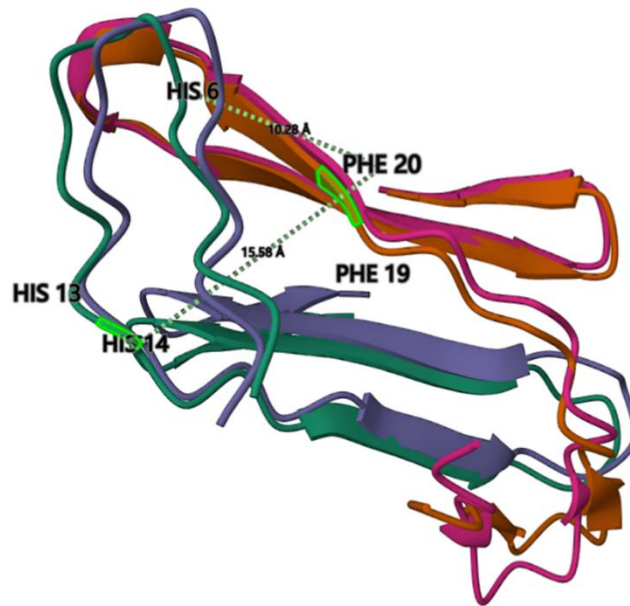

Wild type Aβ1-42, tetramer

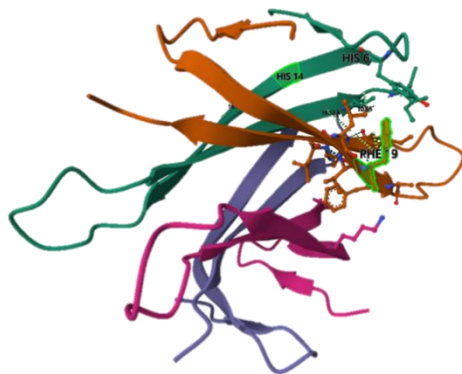

13His→Ala, tetramer

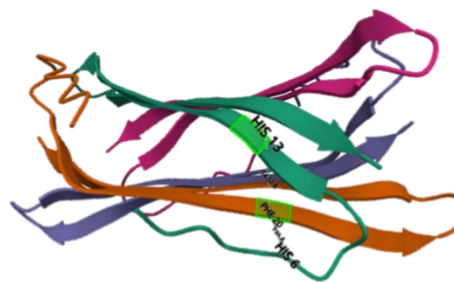

14His→Ala, tetramer

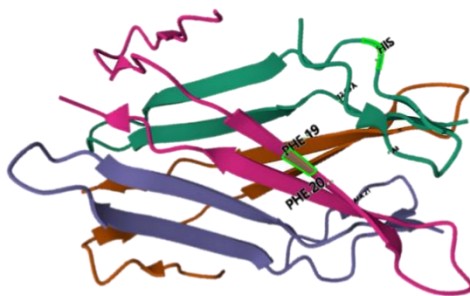

6His→Ala, tetramer

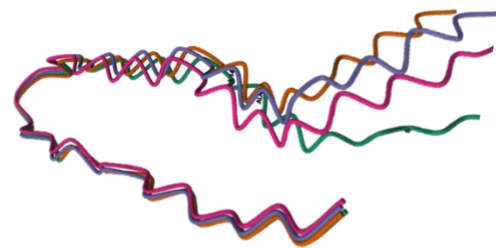

6,13,14His→Ala, tetramer

**Supplementary Fig. 29** AlphaFold2 predicted assembled tetramer structure of wild type Aβ1-42 and different His mutants. The distance between His and F-F (19-20) are marked. There are three His residues in Aβ1-42 (position 6, 13 and 14). To analyze the role of each His in Aβ1-42 assembly, alanine (Ala) was used to replace His one by one when using AlphaFold2 for the prediction.

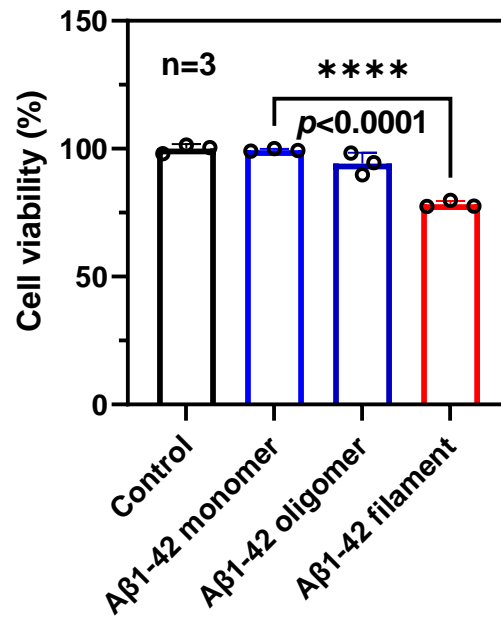

**Supplementary Fig. 30** The cytotoxicity of different assemblies of Aβ 1-42 toward HT-22 cells. n=3 independent cells, bars represent means ± SD. The significant difference was evaluated by two-tailed unpaired t-test. \*\*\*\* $p < 0.0001$ .

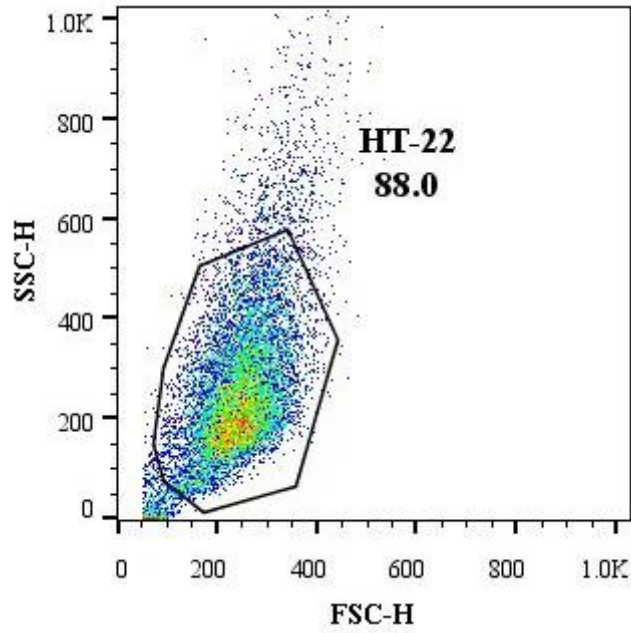

**Supplementary Fig. 31** The representative figure for exemplifying the gating strategy of HT-22 corresponding to ROS of mitochondria (Supplementary Fig. 32). Similar gating strategies were conducted in Fig. 5g and h, Supplementary Fig. 24.

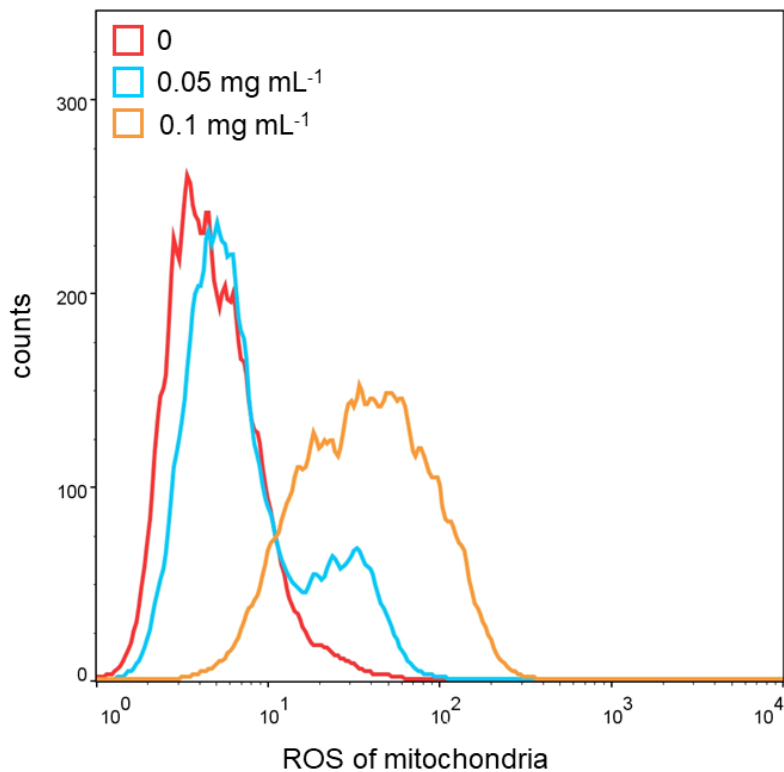

**Supplementary Fig. 32** The assessment of cellular ROS of mitochondria. HT-22 cells were treated by different concentrations of  $A\beta_{1-42}$  filaments and the fluorescence intensity of ROS of mitochondria were collected by flow cytometry.

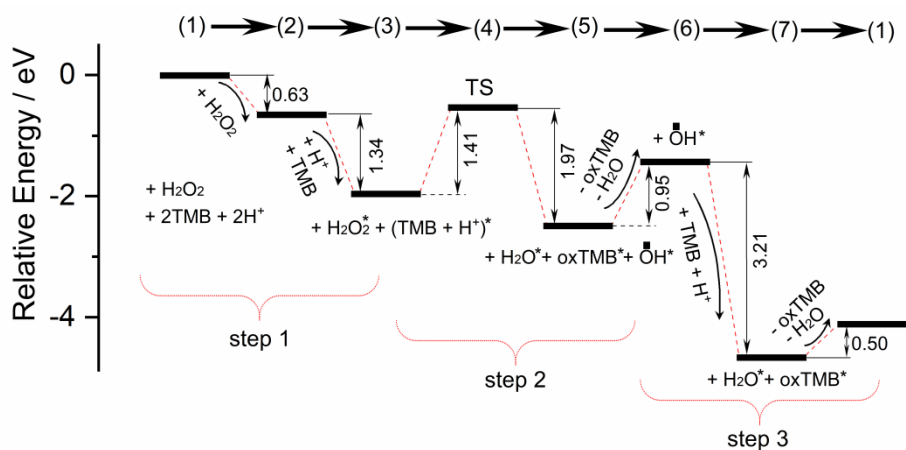

**Supplementary Fig. 33 Relative energies for key intermediate in the peroxidase catalytic cycle.** Energy unit: eV. Three steps were proposed: (1) adsorption of  $\text{H}_2\text{O}_2$  (0.63eV) and ( $\text{H}^+$  + TMB) molecules on Fmoc-F-F (His) (1.34eV) (states 1 to states 3); (2) oxidation reaction of the first TMB molecule oxidized by  $\text{H}_2\text{O}_2^*$  under acidic condition (1.41eV), producing  $\text{HO}^*$ ,  $\text{H}_2\text{O}^*$ , and  $\text{oxTMB}^*$  (1.97eV); and (3) oxidation of the second TMB molecule by second  $\text{HO}^*$  under acidic condition (0.95eV), producing  $\text{H}_2\text{O}^*$  and  $\text{oxTMB}^*$  (3.21eV). The corresponding states were shown in Fig. 6.

**Supplementary Table 1 The co-assembly properties of amino acid & Fmoc-F-F.**

| Amino acid | Side chain                                                                                                                                                                                 | Co-assembly morphology | classification of Amino acid |
|------------|--------------------------------------------------------------------------------------------------------------------------------------------------------------------------------------------|------------------------|------------------------------|
| Asn        | $\begin{array}{c} \text{O} \\ \parallel \\ \text{C} - \text{NH}_2 \\   \\ \text{C} - \text{H}_2 \end{array}$                                                                               | Nanofiber, nanorod     | Polarity uncharged           |
| Asp        | $\begin{array}{c} \text{O} \\ \parallel \\ \text{C} - \text{OH} \\   \\ \text{C} - \text{H}_2 \end{array}$                                                                                 | Nanofiber              | Negative charge              |
| Ser        | $\begin{array}{c} \text{OH} \\   \\ \text{C} - \text{H}_2 \end{array}$                                                                                                                     | Nanofiber, nanorod     | Polarity uncharged           |
| Lys        | $\begin{array}{c} \text{H}_2 \quad \text{H}_2 \quad \text{H}_2 \quad \text{H}_2 \\   \quad   \quad   \quad   \\ \text{C} - \text{C} - \text{C} - \text{C} - \text{NH}_2 \end{array}$       | Nanofiber              | positive charge              |
| Arg        | $\begin{array}{c} \text{NH} \\ \parallel \\ \text{C} - \text{NH}_2 \\   \\ \text{H} \\   \\ \text{C} - \text{H}_2 \\   \\ \text{C} - \text{H}_2 \\   \\ \text{C} - \text{H}_2 \end{array}$ | Nanofiber              | positive charge              |

|     |                                                                                     |                                        |                       |
|-----|-------------------------------------------------------------------------------------|----------------------------------------|-----------------------|
| Pro | 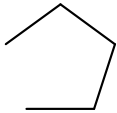   | Nanofiber,<br>nanorod                  | Non-polar             |
| Leu |    | Nanofiber                              | Non-polar             |
| Tyr |    | Spherical<br>arrangement of<br>nanorod | Polarity<br>uncharged |
| Thr |    | Spherical<br>arrangement of<br>nanorod | Polarity<br>uncharged |
| Cys |    | Spherical<br>arrangement of<br>nanorod | Polarity<br>uncharged |
| Ala |    | nanorod                                | Non-polar             |
| Glu |   | nanorod                                | Negative<br>charge    |
| Val |  | nanorod                                | Non-polar             |
| Trp |  | nanorod                                | Non-polar             |
| Gln |  | nanorod                                | Polarity<br>uncharged |
| Gly |  | nanorod                                |                       |
| Phe |  | nanorod                                | Non-polar             |
| Ile |  | nanorod                                | Non-polar             |
| Met |  | nanorod                                | Non-polar             |

---

**Supplementary Table 2** The percent of different secondary structures in the Fmoc-F-F (His) filaments.

| <b>Wavenumber</b>          | <b>Structure</b>            | <b>Percent</b> |
|----------------------------|-----------------------------|----------------|
| 1610-1640 cm <sup>-1</sup> | $\beta$ -Sheet              | 71.60%         |
| 1640-1650 cm <sup>-1</sup> | Radom coils                 | 21.90%         |
| 1650-1660 cm <sup>-1</sup> | $\alpha$ -helix             | 3.10%          |
| 1660-1695 cm <sup>-1</sup> | Antiparallel $\beta$ -sheet | 3.40%          |

**Supplementary Table 3** The percent of different secondary structures in the Fmoc-F-F nanorods.

| <b>Wavenumber</b>          | <b>Structure</b>            | <b>Percent</b> |
|----------------------------|-----------------------------|----------------|
| 1610-1640 cm <sup>-1</sup> | $\beta$ -Sheet              | 26.30%         |
| 1640-1650 cm <sup>-1</sup> | Radom coils                 | 11.20%         |
| 1650-1660 cm <sup>-1</sup> | $\alpha$ -helix             | 19.50%         |
| 1660-1695 cm <sup>-1</sup> | Antiparallel $\beta$ -sheet | 43.20%         |
