# Supplementary material for: Histidine modulates amyloid-like assembly of peptide nanomaterials and confers enzyme-like activity
Source: PubMed Central journal article supplement (PMC10509148; doi:10.1038/s41467-023-41591-1), 2023-09-19
Supplement: 41467_2023_41591_MOESM3_ESM.pdf [file 41467_2023_41591_MOESM3_ESM.pdf]

## Description of Additional Supplementary Files

**Supplementary Data 1:** The optimized atomic coordinates of the Fmoc-F-F molecule.
